# Supplementary material
Source: PubMed Central journal article supplement (PMC5070580)
Supplement: supp_JCO.2015.63.7736_DS_2015.637736.pdf [file supp_JCO.2015.63.7736_DS_2015.637736.pdf]

## Technical Appendix

Part D Formulary Prices were used for the primary analysis presented in this study. These input prices are taken directly from the Prescription Drug Plan Formulary, Pharmacy Network, and Pricing Information Files available through the Centers for Medicare and Medicaid Services and represent the plan level average monthly costs for formulary Part D drugs for a 30 day supply of the dose of each drug selected (doses noted in Appendix Table 1 – Formulary Strength). These prices represent the amount reimbursed for the medication and are used as the input for the out-of-pocket price calculation for each Part D formulary.

We further provide measures of drug prices from three additional sources in Appendix Table 1. The first of these is the Memorial Sloan Kettering Cancer Center (MSKCC) monthly drug costs which were obtained via published data available in Howard, David H., Peter B. Bach, Ernst R. Berndt, and Rena M. Conti. 2015. "Pricing in the Market for Anticancer Drugs." *Journal of Economic Perspectives*, 29(1): 139-62 (<https://www.aeaweb.org/articles.php?doi=10.1257/jep.29.1.139>). For the products we examined that were not included in this published source, we utilized the MSKCC website for current prices for 2014 (<https://www.mskcc.org/sites/default/files/node/25097/documents/chemo-prices-table-bach-center-for-health-policy-and-outcomes-7.2.15.pdf>). We also used two current internet-based data sources to evaluate the quality of the input drug pricing data from the CMS Formulary files. The first was "goodrx.com" which is a prescription drug website that advertises discounted prices. For each drug we selected the drug price available from CVS pharmacy (prices were similar across other locations; we chose CVS for consistency). We also used the 2015 Medicare Part D Plan Finder and the methodology proposed by Bach et al, summarized in this document: <https://www.mskcc.org/sites/default/files/node/25097/documents/methods-for-mskcc-website-version-7.2.15.pdf> and in: Bach PB. Limits on Medicare's ability to control rising spending on cancer drugs. *N Engl J Med*. 2009 Feb 5;360(6):626-33 to determine prices for a month of therapy among Medicare beneficiaries searching for a Part D plan in 2015. Prices were consistent across the Part D Formulary Price (those used in the primary analysis) and the two external sources for 2015 (goodrx.com and the Medicare Part D Plan Finder). Prices were typically lower when using the prices listed using the MSKCC data. Given this, as a sensitivity analysis we included estimates of the primary comparison between 2010 and 2020 out of pocket payments by beneficiaries using the lowest set of input prices (those from MSKCC) to ensure that our conclusions would not change using a different source of pricing data (see Appendix Table 2).

In order to provide more accurate assessments of potential costs to patients we also borrow from the methodology and data published by Howard et al when defining duration of therapy for included products, using the median duration of therapy based on drug's product labels, published randomized trial results, and cost-effectiveness studies ([https://www.aeaweb.org/jep/app/2901/29010139\\_app.pdf](https://www.aeaweb.org/jep/app/2901/29010139_app.pdf)). For products not included in Howard et al's data, we used the drug's product label to identify median duration of therapy. We rounded duration of therapy to the next full month when a partial month was indicated and capped use of a product at 12 months given the benefit design reset in each calendar year.

**Appendix Table 1. Median Duration of Drug Use and Estimated Input Price by Data Source**

| Drug         | Median Duration of Use (months) | Part D Formulary Price | Monthly Price MSKCC 2014 / 2015* | GoodRx.com CVS Price - 2015 | Part D Plan Finder Humana Enhanced Rx - 2015 | Dose for Price (Medscape) | Formulary Strength |
|--------------|---------------------------------|------------------------|----------------------------------|-----------------------------|----------------------------------------------|---------------------------|--------------------|
| Abiraterone  | 8                               | \$7,009                | \$5,433                          | \$8,165                     | \$8,013                                      | 1000 mg/day               | 250mg              |
| Afatinib     | 11                              | \$6,279                | \$5,500                          | \$6,611                     | \$6,487                                      | 40 mg/day                 | 20mg               |
| Axitinib     | 7                               | \$10,057               | \$9,403                          | \$12,081                    | \$11,387                                     | 10 mg/day                 | 5mg                |
| Cabozantinib | 7                               | \$10,888               | \$10,041                         | \$13,022                    | \$10,877                                     | 140 mg/day                | 60mg               |
| Crizotinib   | 8                               | \$11,908               | \$11,375                         | \$13,743                    | \$13,494                                     | 500mg /day                | 200mg              |
| Dabrafenib   | 5                               | \$8,359                | \$9,411                          | \$9,685                     | \$8,817                                      | 300mg /day                | 75mg               |
| Dasatinib    | 12                              | \$9,516                | \$5,220                          | \$10,572                    | \$10,379                                     | 140mg / day               | 140mg              |
| Enzalutamide | 9                               | \$8,128                | \$7,163                          | \$9,033                     | \$8,867                                      | 40mg /qday                | 40mg               |
| Erlotinib    | 11                              | \$6,353                | \$5,134                          | \$6,852                     | \$6,723                                      | 150mg / day               | 150mg              |
| Everolimus   | 5                               | \$9,976                | \$8,541                          | \$11,524                    | \$11,314                                     | 10mg / day                | 5mg                |
| Imatinib     | 12                              | \$7,832                | \$4,462                          | \$10,330                    | \$10,144                                     | 400mg/day                 | 400mg              |
| Lapatinib    | 9                               | \$5,123                | \$3,501                          | \$5,683                     | \$5,576                                      | 1250mg/day                | 250mg              |
| Lenalidomide | 4                               | \$13,683               | \$9,684                          | \$13,813                    | \$14,531                                     | 10mg / day                | 25mg               |
| Nilotinib    | 12                              | \$9,543                | \$6,881                          | \$9,872                     | \$10,383                                     | 150mg / day               | 150mg              |
| Pazopanib    | 8                               | \$7,924                | \$6,512                          | \$8,958                     | \$8,793                                      | 800mg / day               | 200mg              |
| Pomalidomide | 8                               | \$16,093               | \$11,336                         | \$11,999                    | \$16,829                                     | 4mg / days                | 0.5mg              |
| Regorafenib  | 3                               | \$15,206               | \$9,736                          | \$12,756                    | \$17,890                                     | 160mg/day                 | 40mg               |
| Sorafenib    | 6                               | \$10,811               | \$6,064                          | \$13,456                    | \$13,211                                     | 800mg/day                 | 200mg              |
| Sunitinib    | 12                              | \$13,003               | \$5,290                          | \$13,741                    | \$14,455                                     | 50/mg day                 | 50mg               |
| Trametinib   | 5                               | \$9,564                | \$8,812                          | \$10,281                    | \$10,092                                     | 2mg/day                   | 0.5mg              |
| Vandetanib   | 12                              | \$11,421               | \$10,757                         | \$13,684                    | \$12,898                                     | 300mg/day                 | 300mg              |
| Vemurafenib  | 5                               | \$11,241               | \$11,122                         | \$11,535                    | \$10,874                                     | 1920mg/day                | 240mg              |
| Vorinostat   | 4                               | \$11,469               | \$9,552                          | \$12,437                    | \$11,747                                     | 400mg/day                 | 100mg              |

Footnote: Median duration of use was obtained from data provided in: Howard, David H., Peter B. Bach, Ernst R. Berndt, and Rena M. Conti. 2015. "Pricing in the Market for Anticancer Drugs." *Journal of Economic Perspectives*, 29(1): 139-62. For products not included in Howard et al., we used the drug's product label to identify median duration of therapy. Monthly prices (based on the Part D Formulary Price) are those reported in the beneficiary cost file within the CMS Formulary data for the formulary strength noted. These prices represent the average amount paid for the specified dose/supply of therapy at in-area retail pharmacies within the plan's service area. Additional price data from other sources are presented, including the MSKCC Monthly price in 2014/2015 (based on Bach et al methodology and published drug prices for 2015), current prices listed on "GoodRx.com" as of August 2015, and prices listed using the Part D Plan Finder Humana Enhanced Rx website (following the Bach et al methodology for plan options available in August 2015).

**Appendix Table 2. Median Total Out-of-Pocket Costs for Part D Beneficiaries by Drug before (2010) and after (2020) the Doughnut Hole Closes Assuming a Treatment Course of Median Duration Using Monthly Prices from the MSKCC Drug Price List**

| Drug         | Medicare Advantage Plans (MA-PD) |          |          |         |         |         | Stand-Alone PDP |          |          |             |         |         |
|--------------|----------------------------------|----------|----------|---------|---------|---------|-----------------|----------|----------|-------------|---------|---------|
|              | 2010                             |          |          | 2020    |         |         | 2010            |          |          | 2020        |         |         |
|              | 2010                             | IQR      |          | 2020    | IQR     |         | Median (\$)     | IQR      |          | Median (\$) | IQR     |         |
| Abiraterone  | \$6,539                          | \$6,527  | \$6,539  | \$3,995 | \$3,992 | \$3,995 | \$6,539         | \$6,539  | \$6,539  | \$3,995     | \$3,992 | \$3,995 |
| Afatinib     | \$7,391                          | \$7,379  | \$7,391  | \$4,847 | \$4,844 | \$4,847 | \$7,391         | \$7,391  | \$7,391  | \$4,844     | \$4,844 | \$4,847 |
| Axitinib     | \$7,657                          | \$7,645  | \$7,657  | \$5,113 | \$5,110 | \$5,113 | \$7,657         | \$7,657  | \$7,657  | \$5,110     | \$5,110 | \$5,113 |
| Cabozantinib | \$7,880                          | \$7,868  | \$7,880  | \$5,336 | \$5,333 | \$5,336 | \$7,880         | \$7,880  | \$7,880  | \$5,333     | \$5,333 | \$5,336 |
| Crizotinib   | \$8,916                          | \$8,904  | \$8,916  | \$6,372 | \$6,369 | \$6,372 | \$8,916         | \$8,916  | \$8,916  | \$6,369     | \$6,369 | \$6,372 |
| Dabrafenib   | \$6,718                          | \$6,707  | \$6,719  | \$4,174 | \$4,171 | \$4,174 | \$6,718         | \$6,718  | \$6,719  | \$4,171     | \$4,171 | \$4,174 |
| Dasatinib    | \$7,498                          | \$6,244  | \$7,498  | \$4,954 | \$4,951 | \$4,954 | \$7,498         | \$7,498  | \$7,498  | \$4,954     | \$4,951 | \$4,954 |
| Enzalutamide | \$7,589                          | \$7,577  | \$7,589  | \$5,045 | \$5,042 | \$5,045 | \$7,589         | \$7,589  | \$7,589  | \$5,045     | \$5,042 | \$5,045 |
| Erlotinib    | \$7,189                          | \$7,178  | \$7,190  | \$4,645 | \$4,642 | \$4,645 | \$7,189         | \$7,189  | \$7,190  | \$4,642     | \$4,642 | \$4,645 |
| Everolimus   | \$6,501                          | \$4,007  | \$6,501  | \$3,957 | \$3,954 | \$3,957 | \$6,501         | \$6,501  | \$6,501  | \$3,957     | \$3,954 | \$3,957 |
| Imatinib     | \$7,043                          | \$7,031  | \$7,043  | \$4,499 | \$4,496 | \$4,499 | \$7,043         | \$7,043  | \$7,043  | \$4,496     | \$4,496 | \$4,499 |
| Lapatinib    | \$5,941                          | \$5,929  | \$5,941  | \$3,397 | \$3,394 | \$3,397 | \$5,941         | \$5,941  | \$5,941  | \$3,394     | \$3,394 | \$3,397 |
| Lenalidomide | \$6,302                          | \$3,808  | \$6,303  | \$3,758 | \$3,755 | \$3,758 | \$6,302         | \$6,302  | \$6,303  | \$3,758     | \$3,755 | \$3,758 |
| Nilotinib    | \$8,494                          | \$8,483  | \$8,494  | \$5,950 | \$5,947 | \$5,950 | \$8,494         | \$8,494  | \$8,494  | \$5,947     | \$5,947 | \$5,950 |
| Pazopanib    | \$6,971                          | \$6,959  | \$6,971  | \$4,426 | \$4,423 | \$4,426 | \$6,970         | \$6,970  | \$6,971  | \$4,426     | \$4,423 | \$4,426 |
| Pomalidomide | \$8,900                          | \$8,887  | \$8,900  | \$6,356 | \$6,353 | \$6,356 | \$8,900         | \$8,900  | \$8,900  | \$6,356     | \$6,353 | \$6,356 |
| Regorafenib  | \$5,826                          | \$5,814  | \$5,826  | \$3,282 | \$3,279 | \$3,282 | \$5,826         | \$5,826  | \$5,826  | \$3,282     | \$3,279 | \$3,282 |
| Sorafenib    | \$6,185                          | \$6,173  | \$6,185  | \$3,641 | \$3,638 | \$3,641 | \$6,185         | \$6,185  | \$6,185  | \$3,641     | \$3,638 | \$3,641 |
| Sunitinib    | \$7,540                          | \$7,528  | \$7,540  | \$4,996 | \$4,993 | \$4,996 | \$7,540         | \$7,540  | \$7,540  | \$4,993     | \$4,993 | \$4,996 |
| Trametinib   | \$6,569                          | \$6,557  | \$6,569  | \$4,025 | \$4,022 | \$4,025 | \$6,569         | \$6,569  | \$6,569  | \$4,022     | \$4,022 | \$4,025 |
| Vandetanib   | \$10,820                         | \$10,808 | \$10,820 | \$8,276 | \$8,273 | \$8,276 | \$10,820        | \$10,820 | \$10,820 | \$8,273     | \$8,273 | \$8,276 |
| Vemurafenib  | \$7,146                          | \$7,135  | \$7,146  | \$4,602 | \$4,599 | \$4,602 | \$7,146         | \$7,146  | \$7,146  | \$4,602     | \$4,599 | \$4,602 |
| Vorinostat   | \$6,276                          | \$6,264  | \$6,276  | \$3,732 | \$3,729 | \$3,732 | \$6,276         | \$6,276  | \$6,276  | \$3,732     | \$3,729 | \$3,732 |

Footnote: Memorial Sloan Kettering Cancer Center (MSKCC) monthly drug costs which were obtained via published data available in Howard, David H., Peter B. Bach, Ernst R. Berndt, and Rena M. Conti. 2015. "Pricing in the Market for Anticancer Drugs." *Journal of Economic Perspectives*, 29(1): 139-62 (<https://www.aeaweb.org/articles.php?doi=10.1257/jep.29.1.139>). For the products included here that were not included in this published source we utilized the MSKCC website for current prices for 2014 <https://www.mskcc.org/sites/default/files/node/25097/documents/chemo-prices-table-bach-center-for-health-policy-and-outcomes-7.2.15.pdf>.

**Appendix Table 3. Median Total Out-of-Pocket Costs for Part D Beneficiaries by Drug before (2010) and after (2020) the Doughnut Hole Closes Assuming a Treatment Course of Median Duration**

| Drug         | Medicare Advantage Plans (MA-PD) |          |          |         |         |         | Stand-Alone PDP |          |          |             |         |         |
|--------------|----------------------------------|----------|----------|---------|---------|---------|-----------------|----------|----------|-------------|---------|---------|
|              | 2010                             |          |          | 2020    |         |         | 2010            |          |          | 2020        |         |         |
|              | 2010                             | IQR      |          | 2020    | IQR     |         | Median (\$)     | IQR      |          | Median (\$) | IQR     |         |
| Abiraterone  | \$7,156                          | \$7,098  | \$7,200  | \$4,621 | \$4,586 | \$4,655 | \$7,163         | \$7,146  | \$7,199  | \$4,619     | \$4,603 | \$4,654 |
| Afatinib     | \$7,817                          | \$7,721  | \$7,839  | \$5,242 | \$5,229 | \$5,293 | \$7,819         | \$7,781  | \$7,864  | \$5,275     | \$5,234 | \$5,297 |
| Axitinib     | \$7,877                          | \$7,777  | \$7,935  | \$5,345 | \$5,285 | \$5,383 | \$7,855         | \$7,828  | \$7,919  | \$5,314     | \$5,286 | \$5,379 |
| Cabozantinib | \$8,174                          | \$8,073  | \$8,201  | \$5,597 | \$5,586 | \$5,654 | \$8,176         | \$8,135  | \$8,225  | \$5,632     | \$5,588 | \$5,657 |
| Crizotinib   | \$9,120                          | \$8,955  | \$9,174  | \$6,552 | \$6,529 | \$6,626 | \$9,122         | \$9,024  | \$9,168  | \$6,594     | \$6,487 | \$6,621 |
| Dabrafenib   | \$6,454                          | \$6,373  | \$6,468  | \$3,889 | \$3,875 | \$3,922 | \$6,456         | \$6,433  | \$6,482  | \$3,912     | \$3,886 | \$3,925 |
| Dasatinib    | \$10,075                         | \$8,843  | \$10,146 | \$7,531 | \$7,508 | \$7,602 | \$10,074        | \$9,983  | \$10,145 | \$7,528     | \$7,438 | \$7,601 |
| Enzalutamide | \$8,002                          | \$7,940  | \$8,081  | \$5,480 | \$5,434 | \$5,509 | \$7,999         | \$7,977  | \$8,046  | \$5,456     | \$5,435 | \$5,499 |
| Erlotinib    | \$7,853                          | \$7,795  | \$7,888  | \$5,309 | \$5,271 | \$5,338 | \$7,857         | \$7,835  | \$7,900  | \$5,312     | \$5,292 | \$5,346 |
| Everolimus   | \$6,836                          | \$4,340  | \$6,865  | \$4,291 | \$4,277 | \$4,321 | \$6,862         | \$6,835  | \$6,895  | \$4,318     | \$4,287 | \$4,344 |
| Imatinib     | \$9,062                          | \$8,989  | \$9,097  | \$6,508 | \$6,458 | \$6,548 | \$9,063         | \$9,022  | \$9,107  | \$6,519     | \$6,478 | \$6,562 |
| Lapatinib    | \$6,660                          | \$6,622  | \$6,699  | \$4,121 | \$4,096 | \$4,145 | \$6,656         | \$6,643  | \$6,686  | \$4,112     | \$4,099 | \$4,142 |
| Lenalidomide | \$7,084                          | \$4,758  | \$7,132  | \$4,561 | \$4,528 | \$4,575 | \$7,082         | \$7,065  | \$7,116  | \$4,536     | \$4,522 | \$4,570 |
| Nilotinib    | \$10,083                         | \$9,959  | \$10,159 | \$7,545 | \$7,486 | \$7,614 | \$10,082        | \$10,041 | \$10,153 | \$7,536     | \$7,501 | \$7,604 |
| Pazopanib    | \$7,518                          | \$7,460  | \$7,572  | \$4,981 | \$4,942 | \$5,016 | \$7,518         | \$7,495  | \$7,559  | \$4,974     | \$4,954 | \$5,014 |
| Pomalidomide | \$10,800                         | \$10,563 | \$10,841 | \$8,223 | \$8,188 | \$8,293 | \$10,805        | \$10,734 | \$10,872 | \$8,261     | \$8,188 | \$8,320 |
| Regorafenib  | \$6,630                          | \$6,593  | \$6,679  | \$4,099 | \$4,067 | \$4,131 | \$6,625         | \$6,613  | \$6,658  | \$4,081     | \$4,069 | \$4,113 |
| Sorafenib    | \$7,598                          | \$7,563  | \$7,653  | \$5,063 | \$5,031 | \$5,098 | \$7,596         | \$7,575  | \$7,638  | \$5,052     | \$5,033 | \$5,093 |
| Sunitinib    | \$12,163                         | \$11,963 | \$12,263 | \$9,623 | \$9,544 | \$9,723 | \$12,160        | \$12,102 | \$12,262 | \$9,617     | \$9,565 | \$9,716 |
| Trametinib   | \$6,756                          | \$6,663  | \$6,772  | \$4,188 | \$4,174 | \$4,227 | \$6,758         | \$6,732  | \$6,789  | \$4,214     | \$4,185 | \$4,230 |
| Vandetanib   | \$11,218                         | \$11,031 | \$11,262 | \$8,650 | \$8,601 | \$8,717 | \$11,220        | \$11,147 | \$11,267 | \$8,672     | \$8,600 | \$8,723 |
| Vemurafenib  | \$7,149                          | \$7,101  | \$7,210  | \$4,623 | \$4,581 | \$4,657 | \$7,158         | \$7,129  | \$7,198  | \$4,613     | \$4,586 | \$4,657 |
| Vorinostat   | \$6,650                          | \$6,604  | \$6,688  | \$4,112 | \$4,074 | \$4,141 | \$6,643         | \$6,619  | \$6,682  | \$4,099     | \$4,075 | \$4,138 |

Footnote: Authors analysis of the July 15, 2014 quarterly release of the Prescription Drug Plan Formulary, Pharmacy Network, and Pricing Information Files from the Center for Medicaid and Medicare Services. Input price is from the formulary files and represents the average reimbursed amount across each plan for the product listed for one month of therapy at the mean recommended dose. Median duration of use was obtained from data provided in: Howard, David H., Peter B. Bach, Ernst R. Berndt, and Rena M. Conti. 2015. "Pricing in the Market for Anticancer Drugs." *Journal of Economic Perspectives*, 29(1): 139-62. For products not included in Howard et al., we used the drug's product label to identify median duration of therapy (See Technical Appendix for further details).

**Appendix Table 4. Median Total Out-of-Pocket Costs for Part D Beneficiaries by Drug before (2010) and after (2020) the Doughnut Hole Closes for 3 Months of Product Use**

| Drug         | Medicare Advantage Plans (MA-PD) |         |         |         |         |         | Stand-Alone PDP |         |         |             |         |         |
|--------------|----------------------------------|---------|---------|---------|---------|---------|-----------------|---------|---------|-------------|---------|---------|
|              | 2010                             |         |         | 2020    |         |         | 2010            |         |         | 2020        |         |         |
|              | 2010                             | IQR     |         | 2020    | IQR     |         | Median (\$)     | IQR     |         | Median (\$) | IQR     |         |
| Abiraterone  | \$5,412                          | \$5,388 | \$5,428 | \$2,870 | \$2,856 | \$2,884 | \$5,415         | \$5,408 | \$5,428 | \$2,869     | \$2,862 | \$2,883 |
| Afatinib     | \$5,307                          | \$5,276 | \$5,313 | \$2,753 | \$2,745 | \$2,768 | \$5,308         | \$5,297 | \$5,318 | \$2,763     | \$2,750 | \$2,770 |
| Axitinib     | \$5,868                          | \$5,828 | \$5,896 | \$3,330 | \$3,301 | \$3,348 | \$5,861         | \$5,850 | \$5,889 | \$3,316     | \$3,305 | \$3,345 |
| Cabozantinib | \$5,998                          | \$5,952 | \$6,009 | \$3,439 | \$3,429 | \$3,464 | \$5,999         | \$5,981 | \$6,019 | \$3,455     | \$3,434 | \$3,465 |
| Crizotinib   | \$6,146                          | \$6,087 | \$6,168 | \$3,596 | \$3,572 | \$3,622 | \$6,150         | \$6,113 | \$6,166 | \$3,610     | \$3,568 | \$3,619 |
| Dabrafenib   | \$5,618                          | \$5,569 | \$5,627 | \$3,062 | \$3,048 | \$3,082 | \$5,620         | \$5,606 | \$5,635 | \$3,076     | \$3,059 | \$3,084 |
| Dasatinib    | \$5,793                          | \$4,550 | \$5,811 | \$3,249 | \$3,231 | \$3,267 | \$5,792         | \$5,770 | \$5,811 | \$3,246     | \$3,224 | \$3,266 |
| Enzalutamide | \$5,578                          | \$5,556 | \$5,603 | \$3,036 | \$3,023 | \$3,051 | \$5,577         | \$5,569 | \$5,592 | \$3,031     | \$3,024 | \$3,046 |
| Erlotinib    | \$5,316                          | \$5,299 | \$5,326 | \$2,771 | \$2,758 | \$2,779 | \$5,318         | \$5,312 | \$5,330 | \$2,771     | \$2,766 | \$2,781 |
| Everolimus   | \$5,847                          | \$3,353 | \$5,867 | \$3,303 | \$3,289 | \$3,321 | \$5,864         | \$5,847 | \$5,884 | \$3,319     | \$3,300 | \$3,331 |
| Imatinib     | \$5,538                          | \$5,520 | \$5,548 | \$2,991 | \$2,976 | \$3,001 | \$5,540         | \$5,530 | \$5,551 | \$2,994     | \$2,984 | \$3,004 |
| Lapatinib    | \$5,130                          | \$5,116 | \$5,142 | \$2,587 | \$2,576 | \$2,596 | \$5,129         | \$5,125 | \$5,139 | \$2,584     | \$2,579 | \$2,594 |
| Lenalidomide | \$6,404                          | \$4,036 | \$6,439 | \$3,875 | \$3,850 | \$3,887 | \$6,403         | \$6,390 | \$6,428 | \$3,857     | \$3,847 | \$3,883 |
| Nilotinib    | \$5,794                          | \$5,764 | \$5,814 | \$3,251 | \$3,227 | \$3,270 | \$5,795         | \$5,784 | \$5,813 | \$3,248     | \$3,239 | \$3,266 |
| Pazopanib    | \$5,548                          | \$5,523 | \$5,566 | \$3,005 | \$2,987 | \$3,019 | \$5,548         | \$5,539 | \$5,563 | \$3,002     | \$2,994 | \$3,018 |
| Pomalidomide | \$6,778                          | \$6,690 | \$6,794 | \$4,210 | \$4,201 | \$4,249 | \$6,780         | \$6,754 | \$6,812 | \$4,236     | \$4,207 | \$4,252 |
| Regorafenib  | \$6,630                          | \$6,593 | \$6,679 | \$4,099 | \$4,067 | \$4,131 | \$6,625         | \$6,613 | \$6,658 | \$4,081     | \$4,069 | \$4,113 |
| Sorafenib    | \$5,982                          | \$5,962 | \$6,009 | \$3,440 | \$3,422 | \$3,459 | \$5,981         | \$5,971 | \$6,002 | \$3,436     | \$3,426 | \$3,457 |
| Sunitinib    | \$6,313                          | \$6,265 | \$6,340 | \$3,771 | \$3,741 | \$3,797 | \$6,314         | \$6,300 | \$6,340 | \$3,768     | \$3,756 | \$3,793 |
| Trametinib   | \$5,800                          | \$5,743 | \$5,810 | \$3,242 | \$3,228 | \$3,264 | \$5,801         | \$5,785 | \$5,819 | \$3,257     | \$3,238 | \$3,266 |
| Vandetanib   | \$6,078                          | \$6,028 | \$6,090 | \$3,520 | \$3,510 | \$3,546 | \$6,078         | \$6,061 | \$6,091 | \$3,532     | \$3,513 | \$3,543 |
| Vemurafenib  | \$6,036                          | \$6,007 | \$6,072 | \$3,501 | \$3,474 | \$3,523 | \$6,041         | \$6,024 | \$6,066 | \$3,495     | \$3,479 | \$3,522 |
| Vorinostat   | \$6,079                          | \$6,044 | \$6,107 | \$3,539 | \$3,510 | \$3,560 | \$6,074         | \$6,056 | \$6,103 | \$3,529     | \$3,511 | \$3,558 |

Footnote: Authors analysis of the July 15, 2014 quarterly release of the Prescription Drug Plan Formulary, Pharmacy Network, and Pricing Information Files from the Center for Medicaid and Medicare Services. Input price is from the formulary files and represents the average reimbursed amount across each plan for the product listed for one month of therapy at the mean recommended dose. Duration of therapy set at 3 months to estimate out-of-pocket prices for each product using the minimum duration of therapy across all products.

**Appendix Table 5. Median Total Out-of-Pocket Costs for Part D Beneficiaries by Drug before (2010) and after (2020) the Doughnut Hole Closes for 12 Months of Product Use**

| Drug         | Medicare Advantage Plans (MA-PD) |          |          |          |          |          | Stand-Alone PDP |          |          |             |          |          |
|--------------|----------------------------------|----------|----------|----------|----------|----------|-----------------|----------|----------|-------------|----------|----------|
|              | 2010                             |          |          | 2020     |          |          | 2010            |          |          | 2020        |          |          |
|              | 2010                             | IQR      |          | 2020     | IQR      |          | Median (\$)     | IQR      |          | Median (\$) | IQR      |          |
| Abiraterone  | \$8,552                          | \$8,467  | \$8,616  | \$6,023  | \$5,976  | \$6,072  | \$8,562         | \$8,536  | \$8,616  | \$6,020     | \$5,995  | \$6,071  |
| Afatinib     | \$8,131                          | \$8,026  | \$8,155  | \$5,553  | \$5,543  | \$5,608  | \$8,133         | \$8,092  | \$8,181  | \$5,589     | \$5,545  | \$5,613  |
| Axitinib     | \$10,387                         | \$10,213 | \$10,485 | \$7,866  | \$7,774  | \$7,928  | \$10,346        | \$10,301 | \$10,454 | \$7,818     | \$7,761  | \$7,920  |
| Cabozantinib | \$10,895                         | \$10,722 | \$10,940 | \$8,329  | \$8,280  | \$8,391  | \$10,898        | \$10,827 | \$10,966 | \$8,354     | \$8,280  | \$8,410  |
| Crizotinib   | \$11,499                         | \$11,250 | \$11,578 | \$8,917  | \$8,891  | \$9,032  | \$11,495        | \$11,353 | \$11,569 | \$8,981     | \$8,822  | \$9,022  |
| Dabrafenib   | \$9,377                          | \$9,194  | \$9,411  | \$6,794  | \$6,774  | \$6,863  | \$9,382         | \$9,327  | \$9,438  | \$6,837     | \$6,780  | \$6,872  |
| Dasatinib    | \$10,075                         | \$8,843  | \$10,146 | \$7,531  | \$7,508  | \$7,602  | \$10,074        | \$9,983  | \$10,145 | \$7,528     | \$7,438  | \$7,601  |
| Enzalutamide | \$9,215                          | \$9,133  | \$9,321  | \$6,709  | \$6,643  | \$6,746  | \$9,210         | \$9,180  | \$9,272  | \$6,669     | \$6,639  | \$6,726  |
| Erlotinib    | \$8,171                          | \$8,107  | \$8,209  | \$5,626  | \$5,585  | \$5,660  | \$8,174         | \$8,150  | \$8,221  | \$5,630     | \$5,608  | \$5,668  |
| Everolimus   | \$10,295                         | \$7,797  | \$10,365 | \$7,748  | \$7,739  | \$7,821  | \$10,357        | \$10,291 | \$10,426 | \$7,812     | \$7,744  | \$7,886  |
| Imatinib     | \$9,062                          | \$8,989  | \$9,097  | \$6,508  | \$6,458  | \$6,548  | \$9,063         | \$9,022  | \$9,107  | \$6,519     | \$6,478  | \$6,562  |
| Lapatinib    | \$7,424                          | \$7,374  | \$7,478  | \$4,892  | \$4,857  | \$4,919  | \$7,419         | \$7,402  | \$7,460  | \$4,876     | \$4,858  | \$4,915  |
| Lenalidomide | \$12,519                         | \$10,382 | \$12,666 | \$10,060 | \$9,963  | \$10,098 | \$12,514        | \$12,465 | \$12,616 | \$9,972     | \$9,925  | \$10,071 |
| Nilotinib    | \$10,083                         | \$9,959  | \$10,159 | \$7,545  | \$7,486  | \$7,614  | \$10,082        | \$10,041 | \$10,153 | \$7,536     | \$7,501  | \$7,604  |
| Pazopanib    | \$9,095                          | \$9,010  | \$9,176  | \$6,566  | \$6,510  | \$6,618  | \$9,095         | \$9,060  | \$9,156  | \$6,550     | \$6,521  | \$6,611  |
| Pomalidomide | \$14,018                         | \$13,662 | \$14,079 | \$11,451 | \$11,375 | \$11,535 | \$14,024        | \$13,919 | \$14,113 | \$11,480    | \$11,372 | \$11,584 |
| Regorafenib  | \$13,425                         | \$13,275 | \$13,618 | \$10,970 | \$10,831 | \$11,071 | \$13,404        | \$13,354 | \$13,531 | \$10,868    | \$10,811 | \$10,991 |
| Sorafenib    | \$10,831                         | \$10,763 | \$10,941 | \$8,320  | \$8,246  | \$8,387  | \$10,826        | \$10,785 | \$10,909 | \$8,284     | \$8,245  | \$8,365  |
| Sunitinib    | \$12,163                         | \$11,963 | \$12,263 | \$9,623  | \$9,544  | \$9,723  | \$12,160        | \$12,102 | \$12,262 | \$9,617     | \$9,565  | \$9,716  |
| Trametinib   | \$10,102                         | \$9,895  | \$10,141 | \$7,528  | \$7,495  | \$7,593  | \$10,107        | \$10,045 | \$10,169 | \$7,563     | \$7,498  | \$7,608  |
| Vandetanib   | \$11,218                         | \$11,031 | \$11,262 | \$8,650  | \$8,601  | \$8,717  | \$11,220        | \$11,147 | \$11,267 | \$8,672     | \$8,600  | \$8,723  |
| Vemurafenib  | \$11,050                         | \$10,929 | \$11,194 | \$8,564  | \$8,462  | \$8,635  | \$11,065        | \$10,998 | \$11,154 | \$8,526     | \$8,457  | \$8,628  |
| Vorinostat   | \$11,224                         | \$11,076 | \$11,332 | \$8,703  | \$8,612  | \$8,788  | \$11,196        | \$11,126 | \$11,315 | \$8,663     | \$8,588  | \$8,770  |

Footnote: Authors analysis of the July 15, 2014 quarterly release of the Prescription Drug Plan Formulary, Pharmacy Network, and Pricing Information Files from the Center for Medicaid and Medicare Services. Input price is from the formulary files and represents the average reimbursed amount across each plan for the product listed for one month of therapy at the mean recommended dose. Duration of therapy set at 12 months to estimate out-of-pocket prices for each product using the maximum duration of therapy for a single year across all products.
